# Supplementary material
Source: MDPI journal article supplement (https://www.mdpi.com/2073-4441/16/7/1065)
Supplement: s1 [file s1]

Table S1 Environmental quality standards for TN, TP and NH<sub>3</sub>-N for surface water of China (C represents the concentrations of TN, TP and NH<sub>3</sub>-N in each row.) [1]

| NO. | Parameter                 | Water Quality Class |                       |                       |                     |                    |
|-----|---------------------------|---------------------|-----------------------|-----------------------|---------------------|--------------------|
|     |                           | I                   | II                    | III                   | IV                  | V                  |
| 1   | TN/(mg/L)                 | $C \leq 0.2$        | $0.2 < C \leq 0.5$    | $0.5 < C \leq 1.0$    | $1.0 < C \leq 1.5$  | $1.5 < C \leq 2.0$ |
| 2   | TP/(mg/L)                 | $C \leq 0.01$       | $0.01 < C \leq 0.025$ | $0.025 < C \leq 0.05$ | $0.05 < C \leq 0.1$ | $0.1 < C \leq 0.2$ |
| 3   | NH <sub>3</sub> -N/(mg/L) | $C \leq 0.15$       | $0.15 < C \leq 0.5$   | $0.5 < C \leq 1.0$    | $1.0 < C \leq 1.5$  | $1.5 < C \leq 2.0$ |

1. GB 3838-2002; Surface Water Environmental Quality Standards. National Environmental Protection Agency. China Standard Press: Beijing, China, 2002.
